# Supplementary material for: Selective and cyclic detection of Cr3+using poly(methylacrylic acid) monolayer protected gold nanoparticles
Source: Royal Society of Chemistry journal article supplement (doi:10.1039/c3nj00756a), 2013-12-17
Supplement: c3nj00756a.pdf [file c3nj00756a.pdf]

*Supplementary Information for New Journal Chemistry*

**Selective and Cycle Detection of Cr<sup>3+</sup> Using Poly Methacrylic  
Acid Monolayer Protected Gold Nanoparticles**

Junbo Li\*, Chen Han, WenLan Wu, Shijie Zhang, Jinwu Guo, Huiyun Zhou

**Materials.** Tetrahydrofuran, 1,4-dioxane, sodium borohydride, AIBN, bromobenzene, carbon disulfide were purchased from Tianjin Chemical Reagent Factory. Calcium hydride, benzophenone were purchased from Tianjin Chemical Reagent Institute. 2-chloropropyl methyl ester (99%) was purchased from Aldrich, gold chloride acid (>99.9%) was purchased from National Pharmaceutical Group Chemical Reagent corporation. While carbon disulfide, 2-chloropropyl methyl, bromobenzene were handled with vacuum distillation before use, THF prior to use in addition to water, AIBN was refined. RAFT agent 2 - (methoxy-based carbon carbonyl) - phenyl ethyl disulfide(MPED) was synthesized according to the literature procedure <sup>[1]</sup>. All glassware was thoroughly cleaned with freshly aqua regia (hydrochloric acid: nitric acid = 3:1) and rinsed thoroughly with distilled water prior to use.

**Synthesis of the PMAA.** Polytert-Butyl methacrylate (PtBMA) was firstly synthesized

---

\* Corresponding authors at: College of Chemical Engineering & Pharmaceutics, Henan University of Science & Technology, Luo Yang, China, 471023.

*E-mail addresses:* [Lijunbo@haust.edu.cn](mailto:Lijunbo@haust.edu.cn) (J.B. Li);

Tel: +86-379-64231914; Fax: +86-379-64232193.

by RAFT technique. The reaction mixture of tertiary-Butyl methacrylate (4g, 0.028mol), MPED (0.042g, 0.15mmol), AIBN(0.008g, 0.0487mmol) and tetrahydrofuran 4ml was degassed by three freeze-pump-thaw cycles before heating in a thermostated oil bath at 70°C for 24h. After the polymerization, the poly(t-BMA) was isolated by precipitating in a water-methanol(1:4) mixture.

PMAA was prepared by hydrolyzing the poly(t-BMA) under acidic condition. Polymer was dispersed in a 3ml HCL and 50ml 1,4-dioxane. The reaction mixture was heated at 90°C for 24h. Polymer was precipitated from 1,4-dioxane into ether. The synthesis procedures are illustrated in Scheme 1s.

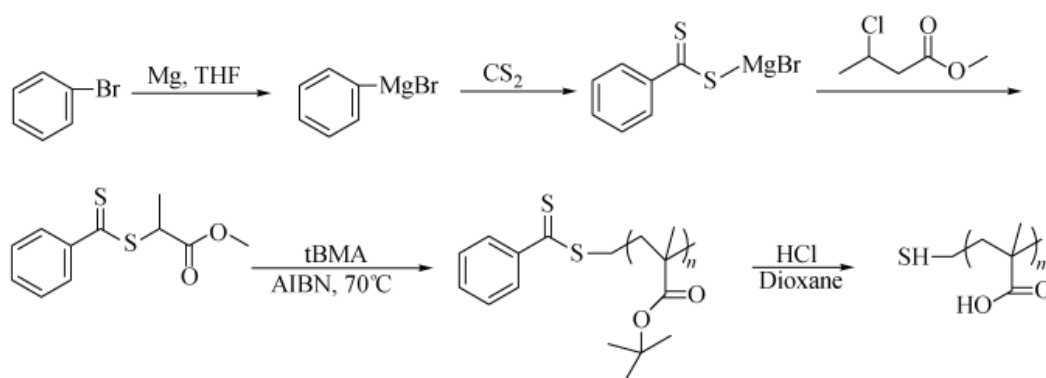

Scheme 1s schematic representation for the synthesis of PMAA

**Characterized polymer by <sup>1</sup>H-NMR and GPC.** The GPC trace of poly(t-BMA) is shown in Fig 1s. From Figure 1, the molecular weight of poly(t-BMA) is 5240, and the PDI is 1.32. This can be used to calculate the PMAA molecular weight for 3120. Fig. 2s is the <sup>1</sup>HNMR spectrum of PtBMA and PMAA. After comparing to A and B, the disappearance of tert-butyl resonance at δ=1.50ppm, and the emerging of carboxyl at δ=12.4ppm, indicates the hydrolysis of tert-butyl has been completed.

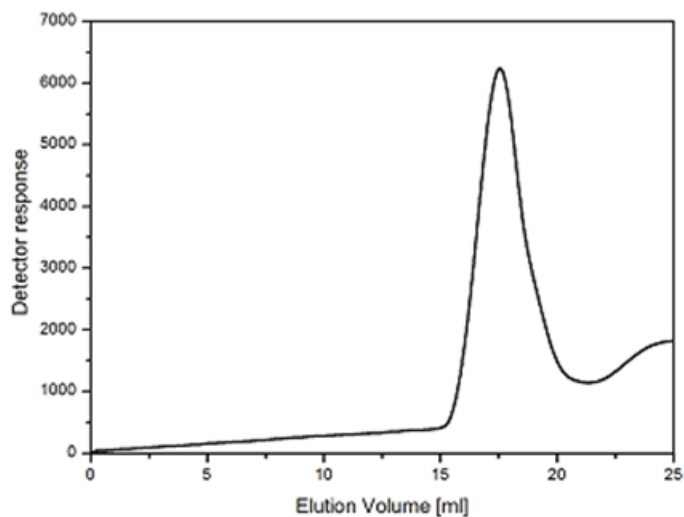

Fig. 1s GPC traces of poly (tBMA) in DMF at room temperature

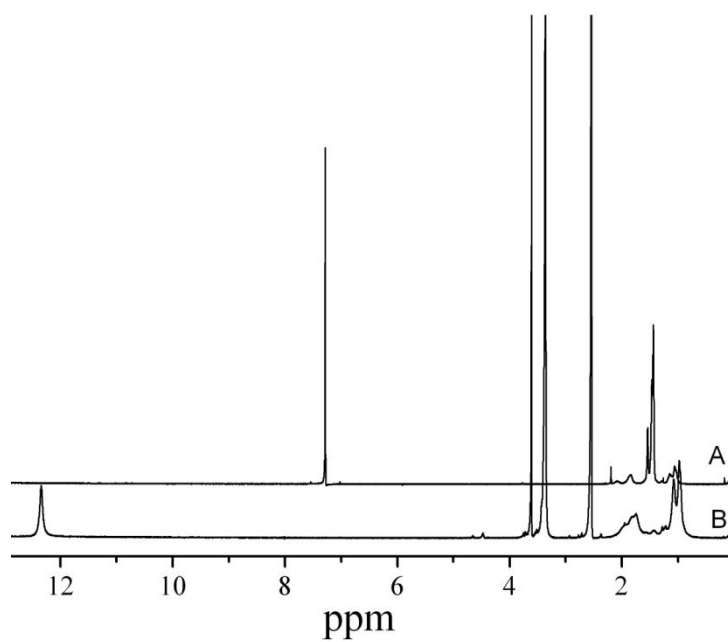

Fig. 2s (A)  $^1\text{H-NMR}$  spectrum of PtBMA in  $\text{CDCl}_3$  and (B)  $^1\text{H-NMR}$  spectrum of PMAA in  
DMSO

## REFERENCES

- [1] S. Perrier, C. Barner-Kowollik, J. F. Quinn, P. Vana and T. P. Davis,  
Macromolecules, 2002, **35**, 8330.
